# Supplementary material for: Facile light-initiated radical generation from 4-substituted pyridine under ambient conditions
Source: Royal Society of Chemistry journal article supplement (doi:10.1039/d0cc02538k), 2020-01-01
Supplement: d0cc02538k1.pdf [file d0cc02538k1.pdf]

## Supporting Information

### Facile light-initiated radical generation from 4-substituted pyridine under ambient conditions

Ami Nakayama, Haru Kimata, Kazuhiro Marumoto, Yohei Yamamoto and Hiroshi  
Yamagishi\*

*Department of Materials Science, Faculty of Pure and Applied Sciences, and Tsukuba Research Center for Energy Materials Science (TREMS) University of Tsukuba 1-1-1 Tennodai, Tsukuba, Ibaraki 305-8573, Japan.*

\*Correspondence and requests for materials should be addressed to Hiroshi Yamagishi (yamagishi.hiroshi.ff@u.tsukuba.ac.jp).

## Table of Contents

|                                            |    |
|--------------------------------------------|----|
| 1. Materials.....                          | S3 |
| 2. General .....                           | S3 |
| 3. Thermogravimetric Analysis.....         | S4 |
| 4. NMR Spectroscopy .....                  | S5 |
| 5. PXRD .....                              | S7 |
| 6. FT-IR Spectroscopy .....                | S7 |
| 7. Electronic Absorption Spectroscopy..... | S8 |
| 8. Diffuse reflectance Spectroscopy.....   | S8 |
| 9. ESR Spectroscopy .....                  | S9 |
| 10. Supporting Reference.....              | S9 |

## 1. Materials

Commercial reagents were purchased from Sigma-Aldrich, TCI, and Wako Pure Chemical Industries, Ltd. Ionic salts (TEABF<sub>4</sub>, TEANO<sub>3</sub>, TMABF<sub>4</sub>, and NaBF<sub>4</sub>) were recrystallized prior to use. **Py<sub>6</sub>Mes** was synthesized according to the previous literature<sup>S1</sup> and recrystallized from acetonitrile prior to use.

## 2. General

Light irradiation was conducted with a Hamamatsu model LC-L1V5 UV-LED spot light source. Thermogravimetric analysis (TGA) was conducted on a Seiko Instruments Inc. model EXSTAR7000 : TG/DTA7300 in a temperature range from 40 to 210 °C at a heating rate of 5 °C min<sup>-1</sup> under constant Ar flow. <sup>1</sup>H NMR spectra were recorded on a JEOL JMTC-400/54/SS and on a Bruker AVANCE-400 spectrometers (<sup>1</sup>H NMR, 400 MHz) using residual DHO signal as an internal standard. Powder X-ray diffraction (XRD) patterns were recorded on a RIGAKU model Miniflex600 diffractometer with a CuK $\alpha$  radiation source (40 kV and 15 mA), equipped with a model D/Tex Ultra2-MF high-speed 1D detector. The PXRD data were collected in a range from 3 to 30° in 2 $\theta$  by a step-scan mode with a step size of 0.01°. Fourier-transform infrared (FT-IR) spectra were acquired on a JASCO model FT/IR-4200 Spectrometer equipped with an ATR PRO450-S single reflection ATR accessory. Electronic absorption spectra were recorded on a JASCO model V-570 UV/VIS/NIR spectrometer. Diffuse reflectance spectra were recorded on JASCO model V-570 UV/VIS/NIR spectrometer equipped with a JASCO model ISN-470 integrating sphere option. The measurement procedures and the detailed information of the apparatus of Electron Spin Resonance (ESR) spectroscopy are written in the following section.

### 3. Thermogravimetric Analysis

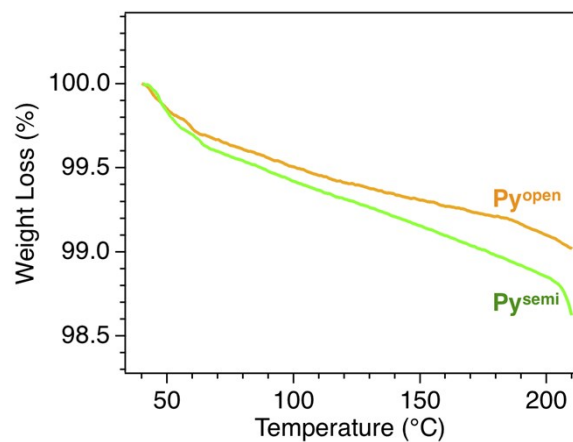

**Figure S1.** TGA profiles of **Py<sup>open</sup>** (orange curve) and **Py<sup>semi</sup>** (green curve). Each sample was dried for 2 h under reduced pressure prior to the measurements.

## 4. NMR Spectroscopy

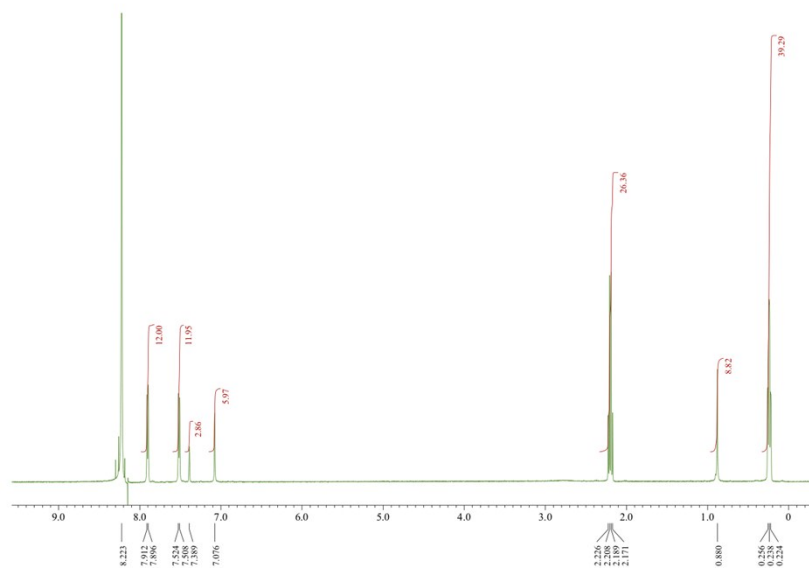

**Figure S2.** <sup>1</sup>H NMR spectrum of **Py<sup>semi</sup>** in 35 wt% D<sub>2</sub>O solution of DCl.

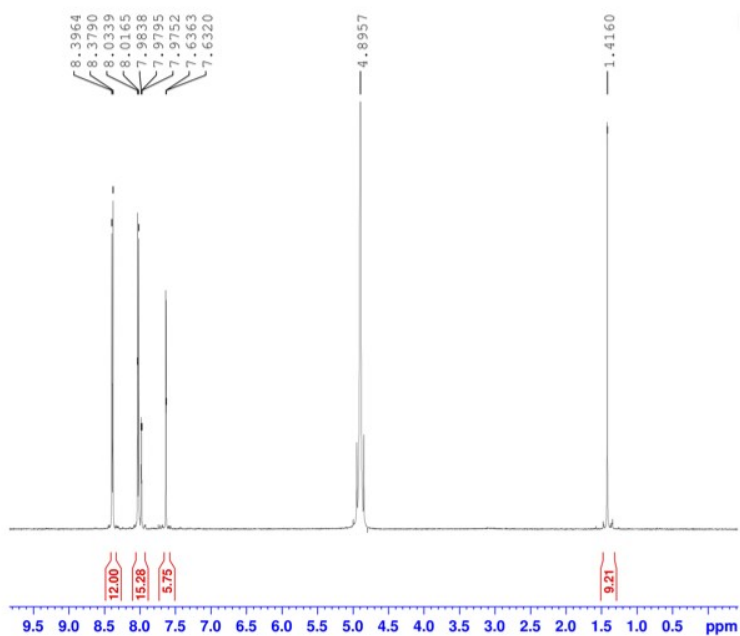

**Figure S3.** <sup>1</sup>H NMR spectrum of **Py<sub>6</sub>Mes** in 5 wt% D<sub>2</sub>O solution of DCl.

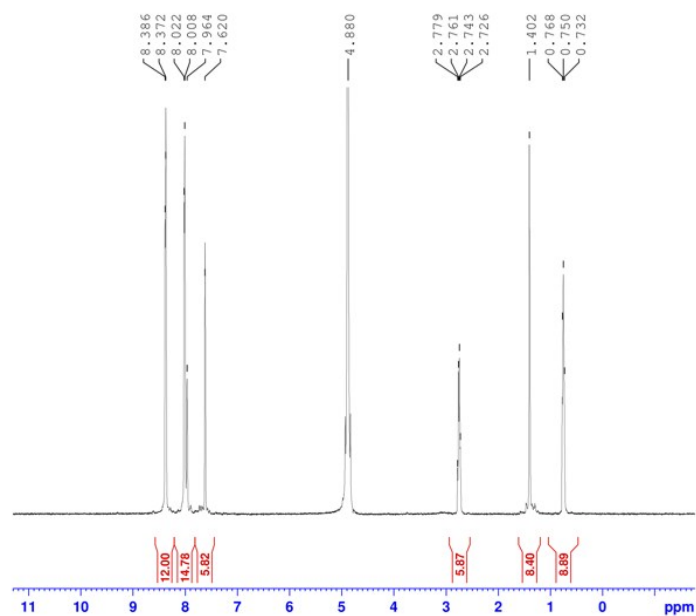

**Figure S4.**  $^1\text{H}$  NMR spectrum of  $\text{Py}^{\text{semi}}$  in 5 wt%  $\text{D}_2\text{O}$  solution of  $\text{DCl}$ . The powder sample of  $\text{Py}^{\text{semi}}$  was irradiated with UV light for 20 min prior to dissolving into  $\text{DCl}$ .

## 5. PXRD

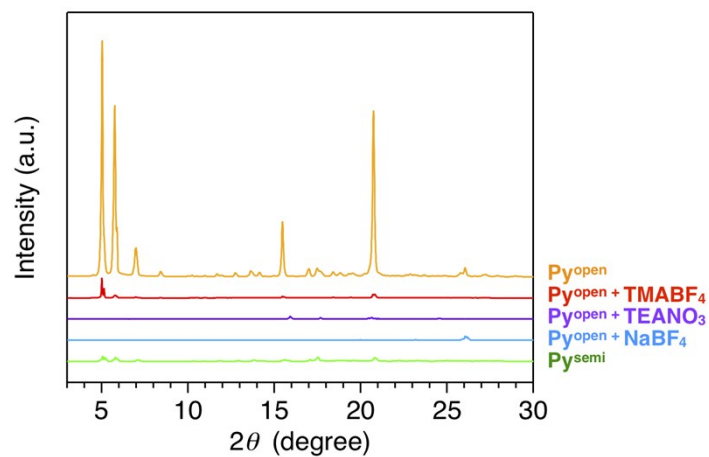

**Figure S5.** PXRD patterns of **Py<sup>open</sup>** (orange line), **Py<sup>semi</sup>** (green line), and **Py<sup>open</sup>** immersed in aqueous solutions of TMABF<sub>4</sub> (red line), TEANO<sub>3</sub> (purple line), and NaBF<sub>4</sub> (blue line).

## 6. FT-IR Spectroscopy

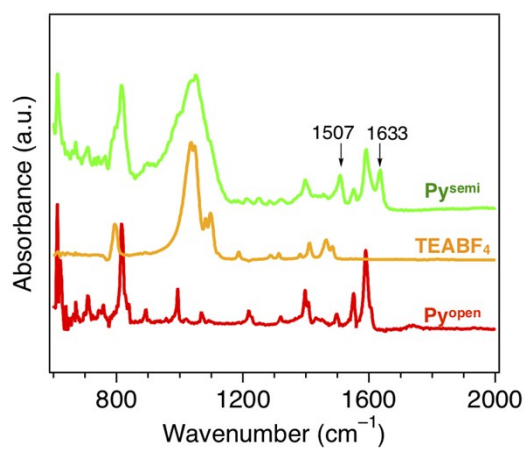

**Figure S6.** FT-IR spectra of **Py<sup>semi</sup>** (green line), **Py<sup>open</sup>** (red line), and TEABF<sub>4</sub> (orange line).

## 7. Electronic Absorption Spectroscopy

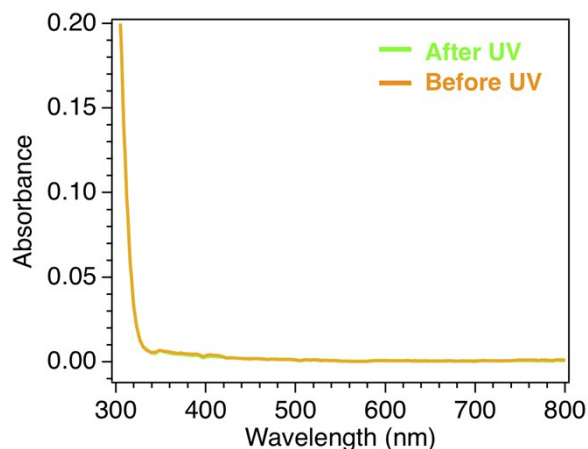

**Figure S7.** Electronic absorption spectra of acetonitrile solutions containing **Py<sub>6</sub>Mes** (100  $\mu$ M) and TEABF<sub>4</sub> (100  $\mu$ M) before (orange curve) and after (green curve) irradiation of UV light for 3 min.

## 8. Diffuse Reflectance Spectroscopy

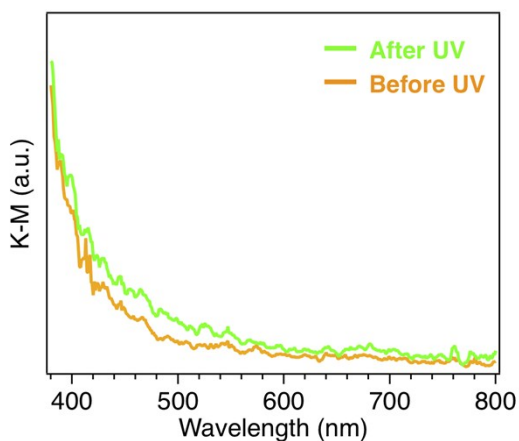

**Figure S8.** Diffuse reflectance spectra of water-immersed powder samples of **Py<sup>open</sup>** before (orange curve) and after (green curve) the irradiation with UV light. The powder samples of **Py<sup>open</sup>** were prepared by immersion into deionized water instead for 24 h at 298K.



## 9. ESR Spectroscopy

ESR spectra of **Py<sup>semi</sup>** were recorded on a JEOL RESONANCE JES-FA200 X-band ESR spectrometer. A known amount of powder sample was fixed on a quartz substrate with silicone grease. The quartz substrate was then put in an ESR quartz sample tube and sealed with helium gas. The temperature was controlled with a JEOL RESONANCE ES-CT470 helium gas flow cryostat. The radical concentrations were calibrated with a standard  $\text{Mn}^{2+}$  marker sample and a solution of 4-hydroxy-2,2,6,6-tetramethylpiperidin-1-oxyl (TEMPO) as a standard. The UV light irradiation was conducted after cooling down to 20 K.

ESR spectra of **Py<sup>semi</sup>** after annealing for 1 h at 423 K under constant Ar flow and ESR spectra of **Py<sup>open</sup>** immersed in aqueous solutions of  $\text{NaBF}_4$ ,  $\text{TMABF}_4$ , and  $\text{TEANO}_3$  were recorded at 100 K on a Bruker model EMXPlus9.5/2.7 equipped with a Bruker  $\text{N}_2$ -temperature controller. Known amount of powder samples were respectively fixed on quartz substrates with silicone grease. The quartz substrates were then put in quartz tubes and sealed after purging with  $\text{N}_2$  gas. The 3-min UV light irradiation was conducted after cooling down to 100 K. The  $g$  values of **Py<sup>open</sup>** immersed in aqueous solutions of  $\text{NaBF}_4$ ,  $\text{TMABF}_4$ , and  $\text{TEANO}_3$  are 2.00371, 2.00354, and 2.00387, respectively.

## 10. Supporting Reference

- (S1) H. Yamagishi, H. Sato, A. Hori, Y. Sato, R. Matsuda, K. Kato, T. Aida, Self-assembly of lattices with high structural complexity from a geometrically simple molecule. *Science* 2018, **361**, 1242–1246.
